# Supplementary material for: Characterization of probiotic Escherichia coli isolates with a novel pan-genome microarray
Source: PubMed Central journal article supplement (PMC2246269; doi:10.1186/gb-2007-8-12-r267), 2007-12-18
Supplement: gb-2007-8-12-r267-S3.pdf [file gb-2007-8-12-r267-S3.pdf]

# Design of *E. coli* chip v2 (pan-genome chip)

## Sequences

We have included the following strains in the design, primarily obtained from NCBI GenomeProjects [34]:

| Strain                                            | Accession        | NCBI Proj ID | contigs | ORFs              | length    |
|---------------------------------------------------|------------------|--------------|---------|-------------------|-----------|
| Escherichia coli 042 chromosome                   | <sup>a</sup> -   | 340          | 1       | 4607              | 5 241 977 |
| Escherichia coli 042 plasmid                      | .                | 340          | 1       | 106               | 113 346   |
| Escherichia coli 101-1 chromosome                 | AAMK01000001-70  | 16193        | 70      | 4353              | 4 880 382 |
| Escherichia coli 53638 chromosome                 | AAKB01000001-119 | 15639        | 119     | 4779              | 5 289 471 |
| Escherichia coli 536 chromosome                   | CP000247         | 16235        | 1       | 4341              | 4 938 920 |
| Escherichia coli B chromosome                     | -                | 18083        | 1       | 4076              | 4 629 819 |
| Escherichia coli B171 chromosome                  | AAJX01000001-159 | 15630        | 159     | 4780              | 5 299 753 |
| Escherichia coli B171 plasmid                     | AB024946         | 15630        | 1       | 69                | 68 817    |
| Escherichia coli B7A chromosome                   | AAJT01000001-198 | 15572        | 198     | 4646              | 5 202 558 |
| Escherichia coli CFT073 chromosome                | AE014075         | 313          | 1       | 4653              | 5 231 428 |
| Escherichia coli E11019 chromosome                | AAJW01000001-15  | 15578        | 115     | 4839              | 5 384 084 |
| Escherichia coli E22 chromosome                   | AAJV01000001-109 | 74230453     | 109     | 4943              | 5 516 160 |
| Escherichia coli E2348 chromosome                 | -                | 341          | 4       | 4592              | 5 071 653 |
| Escherichia coli E2348 pB171 plasmid              | -                | 341          | 1       | 70                | 68 890    |
| Escherichia coli E2348 p9123 plasmid              | -                | 341          | 1       | 5                 | 6 293     |
| Escherichia coli E2348 pGEPAT plasmid             | -                | 341          | 1       | 3                 | 2 233     |
| Escherichia coli E24377A chromosome               | AAJZ01000001     | 13960        | 1       | 4407              | 4 980 187 |
| Escherichia coli F11 chromosome                   | AAJU01000001-88  | 15576        | 88      | 4593              | 5 206 906 |
| Escherichia coli H10407 chromosome                | -                | -            | 89      | 4865              | 5 428 706 |
| Escherichia coli HS chromosome                    | AAJY01000001     | 13959        | 1       | 4126              | 4 643 538 |
| Escherichia coli K12-MG1655 chromosome            | U00096           | 225          | 1       | 4122              | 4 639 675 |
| Escherichia coli K12-W3110 chromosome             | AP009048         | 16351        | 1       | 4133              | 4 646 332 |
| Escherichia coli O103Oslo chromosome <sup>b</sup> | -                | -            | 1115    | 4571              | 5 231 845 |
| E. coli O157RIMD0509952 chromosome                | BA000007         | 226          | 1       | 4989 <sup>c</sup> | 5 498 450 |
| Escherichia coli O157RIMD0509952 pO157            | AB011549         | 226          | 1       | 70                | 92 721    |
| Escherichia coli O157RIMD0509952 pOSAK1           | AB011548         | 226          | 1       | 3                 | 3306      |
| Escherichia coli RS218 chromosome                 | -                | -            | 1       | 4898              | 5 089 234 |
| Escherichia coli RS218 plasmid                    | -                | -            | 1       | 115               | 114 233   |
| Escherichia coli UTI189 chromosome                | CP000243         | 16259        | 1       | 4466              | 5 065 741 |
| Escherichia coli UTI189 plasmid                   | CP000244         | 16259        | 1       | 114               | 114 230   |
| Escherichia coli VR50 chromosome <sup>b</sup>     | -                | -            | 1228    | 4453              | 5 064 870 |
| Escherichia coli APEC-O1 chromosome               | CP000468         | 16718        | 1       | 4551              | 5 082 025 |
| Escherichia coli O157EDL933 chromosome            | NC_002655        | 259          | 1       | 4664 <sup>c</sup> | 5 528 445 |
| Escherichia coli O157EDL933 plasmid               | AF074613         | 259          | 1       | 70                | 92 077    |
| Shigella boydii Sb227 chromosome                  | CP000036         | 13146        | 1       | 4356              | 4 519 823 |
| Shigella dysenteriae M131649 chromosome           | -                | 346          | 234     | 4755              | 4 962 690 |
| Shigella dysenteriae Sd197 chromosome             | CP000034         | 13145        | 1       | 4237              | 4 369 232 |
| Shigella dysenteriae Sd197 pSD1197                | CP000035         | 13145        | 1       | 160               | 182 726   |
| Shigella flexneri 2457T chromosome                | AE014073         | 408          | 1       | 4388              | 4 599 354 |
| Shigella flexneri 301 chromosome                  | AE005674         | 310          | 1       | 4410              | 4 607 203 |
| Shigella flexneri 301 pCP301 plasmid              | AF386526         | 310          | 1       | 194               | 221 618   |
| Shigella flexneri 8401 chromosome                 | CP000266         | 166375       | 1       | 4383              | 4 574 284 |
| Shigella sonnei 53G chromosome                    | -                | -            | 5       | 4780              | 5 220 473 |
| Shigella sonnei Ss046 chromosome                  | CP000038         | 13151        | 1       | 4443              | 4 825 265 |
| Shigella sonnei Ss046 pSS plasmid                 | CP000039         | 13151        | 1       | 179               | 214 396   |

<sup>a</sup>The genome sequence has not been completed and an accession number has not yet been assigned.

<sup>b</sup> Sequences generated using 454 technology representing a large number of contigs are almost certainly not complete

<sup>c</sup>These genes were predicted using EasyGene version 1.2. All other genes were predicted using EasyGene version 1.0.

| Segment            | Count |
|--------------------|-------|
| E.coli Main chr.   | 24    |
| Shigella Main chr. | 8     |
| E.coli Plasmids    | 10    |
| Shigella Plasmids  | 3     |

## Gene prediction

Genes have been predicted using in-house EasyGene version 1.0 with an R-cutoff of 2.0. All coding sequences have been included in the design.

For two of the *E. coli* genomes a program bug has prevented the prediction of genes in both strands and for these two sequences a gene prediction has been downloaded from Copenhagen University [35] - the predictions provided are made using EasyGene 1.2 with 2.0 as R-cutoff.

## Blast

In order to reduce the homology between similar genes among the different strains and alignment and consensus approach has been chosen.

All orfs have been BLASTed against each other and labelled "Homologous" by the following criteria:

1. E-value better (lower) than  $10^{-5}$
2. Score better (higher) than 55 – equivalent of the score of the shortest two sequences.
3. The alignment length should constitute 50% or more of the longer of the two aligned sequences.

All homologous genes are grouped recursively. Being least conservative (disregarding the depth of similarity) genes A, B,C,and D are grouped if A+B and B+C and C+D are homologous, even though A+C has not been marked as homologous by the definitions above. A second step is introduced which removed sequences which are least homologous to all others. This is done by counting all-against-all matches within the group and sorting by the count. The gene with the least similarity is removed if different from the maximum similarity. After a sequence is removed, the all-against-all similarity is recalculated. This is done until all sequences have matches to all sequences. The second step was included to prevent small sequences from being grouped in the same consensus group if one was similar to the first half of the consensus and the other similar to the end second half of the consensus. If this is the case, the derivation of the consensus is better off excluding these highly homologous short sequences.

Genes with no homology were placed in groups of only the sequence itself ('singles') and the groups with more than one sequence ('multiples') are aligned using CLUSTALw with standard settings [21].

In each alignment the consensus sequence is derived by weighting the frequency of the nucleotides at residue  $r$ , with the background frequency in all genes in the group. That is, base  $N$  is chosen if it has the largest weighted frequency,  $W_r$ :

$$W_r = f_{r, N \in A, T, G, C} \times w_N$$

Where  $f_{r,N}$  is the frequency of base  $N$  at the residue  $r$  and  $w_N$  is the background frequency of base  $N$  in the genes. Gaps are not counted and will not occur in the consensus.

For larger windows having less conservation there exist increased possibility of partial hybridization and cross-hybridization. A score of Shannon information measure is introduced to prioritize probes having higher conservation this is described below.

## Weighted conservation scores (between 0 and 1000)

Generally, conservation scores refer to the Shannon's information measure [23]:

$$R_i = 2.0 + \sum_{a=A}^T P_i^a \cdot \log_2(P_i^a)$$

This is a value between 0 and 2, where 2 refer to a fully conserved position in an alignment and 0 to a position where either base is equally frequent. Consequently, for a set of perfectly aligned sequences, the conservation score will consists of a row of 2's and the weighted conservation score of probes targeted at this alignment would be 1000.

According to [24], the influence of a mismatch on the measured hybridization intensities varies with its position, with positions in the end having less influence<sup>1</sup>. Therefore, the performance for a probe targeted at a set of non-perfectly aligned sequences will not only depend on the number of the mismatches and their conservation score, but also on the position of the mismatches.

Thus, this influence was modeled by a second order polynomial function depending on the length of the probe:

$$w_i = \frac{1 - \sqrt{0.5}}{(1 - m)^2} * (i - m)^2 + \text{sqrt}(0.5)$$

Here,  $w_i$  is the weight for the  $i^{\text{th}}$  position, and  $m$  is the middle position of the probe (probe length / 2 + 0.5). This gives a parable with minimum value of  $\text{sqrt}(0.5)$  at the middle bp position and the value of 1 at either end.

The shannon entropy value (R) for each mismatch bp is scaled to a value between  $\text{sqrt}(0.5)$  and 1.

$$R_{i,\text{scaled}} = \frac{E_i}{2} * (1 - \sqrt{0.5}) + \sqrt{0.5}, \quad i=1 \dots \text{probe length } i^{\text{th}} \text{ position}$$

The probe's weighted conservation score is the product of the weighted position scores for mismatch bp's.

$$\text{weighted conservation score} = 1000 * \prod_j^N E_j$$

Here,  $j$  is the indices of any mismatch probes.

Consequently, when position dependent weights are multiplied with shannon entropy values, the following criteria are fulfilled:

A center mismatch position with conservation score 0 would be weighed with  $\text{sqrt}(0.5)$  ( $w=0.71$ ) and therefore result in an overall weighted conservation score of 500.

---

<sup>1</sup> Although they found less influence from mismatches at the surface end of the probe than the solution end, we chose to model the influence with equal weight to both ends, and most in the middle, since their experimental measurements where noisy and also specific to the microarray technology used in their study.

An end mismatch position would not be down-weighted ( $w=1$ ) and a probe with a single end mismatch would receive an overall weighted conservation score corresponding to its scaled shannon conservation value (between  $\sqrt{2}$  and 1) multiplied by 1000.

## Gap score

For each probe targeted at a consensus sequence (a sequence based on an alignment of multiple predicted orfs), a gap score is calculated as the maximum fraction of the probe length that is targeted at a gaps.

gap score = number of gaps / length of probe \* 1000

For example, for a probe where the targeted consensus sequence is based on the following alignment, the gap score would be 500.

```
- - - - ATGC  
ATGCATGC
```

While the gap score was used both as a score to avoid targeting gaps in the alignment as well as a means of distinguishing between sequences from different strains, the inverse gap score was defined as '1- gap score', to give high scores for probes avoiding gap areas.

## Probe selection – area 1 and 2

The scores just introduced (conservation score and gapscore) were combined with standard design properties folding, melting, complexity, and homology which are calculated by oligowiz [22].

The homology and complexity databases used by OligoWiz were generated with the format\_oligowiz\_db backend utility provided by Henrik Bjørn - format\_oligowiz\_db.pl (available upon request).

Options used:

-genome [consensus fasta file] -dbname "ec02\_score55"

For calculating probe properties we used the backend Perl script for OligoWiz2 - generic.oligowiz2.pl (available upon request).

Options used:

-lmin=55 -lmax=60 -length=57 -posscoretype=1 -embed.

Two areas are defined:

Covering the conserved regions (low gap score, high conservation score)

Regions of present absent stretches – typically flanking regions of the genes (high gap score, high conservation score)

The overall scores are calculated by summarizing property  $p$  weighted by  $w_p$ .

$$S_w = \frac{\sum_{p \in A..G} \frac{P_p}{1000} \cdot w_p}{\sum_p w_p}$$

The scores are weighted as follows:

| <i>Property ( score 0-1000)</i> | <i>Sub-design 1</i> | <i>Sub-design 2</i> |
|---------------------------------|---------------------|---------------------|
| A. Cross hybridization          | 2.0                 | 2.0                 |
| B. Melting temperature          | 2.0                 | 2.0                 |
| C. Position                     | (not included)      | (not included)      |
| D. Weighted information         | 2.0 ( $\geq 500$ )  | 2.0 ( $\geq 500$ )  |
| E. Complexity                   | 0.7                 | 0.7                 |
| F. Gap score                    | (not included)      | 2.0 ( $\geq 500$ )  |
| G. 1000 – gap score             | 2.0 ( $\geq 500$ )  | (not included)      |
| H. Folding                      | 1.0                 | 1.0                 |

Probes within the individual group are sorted by the weighted score. Starting from the top of this list, probes are selected if: 1) The score is bigger than the minimum score allowed (I) and the distance to the any of the probes selected is smaller than the minimum allowed (K). The minimal score allowed is neglected if the total number of probes designed for the group, is below the minimum (H). The process will stop when the maximum number of probes (H) is reached. All probes including non-standard nucleotides (standard=ATGC) were removed before the probe selection step.

| <i>Parameter</i>                                  | <i>Subdesign 1</i>     | <i>Subdesign 2</i>      |
|---------------------------------------------------|------------------------|-------------------------|
| H. Minimum number of probes ( disregarding score) | 2.0                    | 2.0                     |
| I. Minimum score                                  | 0.0 (0.41732 observed) | 0.0 (0.390402 observed) |
| J. At least n probes                              | 10                     | 0                       |
| K. Minimum probe distance                         | 10                     | 10                      |
| L. Maximum probes pr. gene                        | 29                     | 13                      |
| <i>Number of probes</i>                           | 305 285                | 33 696                  |

## Intergenic regions – sub-design 3

Intergenic segments were extracted for *E. coli* K12 MG1655 and *E. coli* O157:H7 EDL933 between genes (not distinguishing between strand). Probes were designed for both the positive and negative strand of each of these segments.

If intergenic segments were longer than 225 bps, they were divided into fragments, for which oligos were targeted in the subsequent design phase, to avoid the close clustering of probes in smaller areas of a longer intergenic stretch. The number of fragments was decided according to the following formula (floor):

$$n = \lfloor \sqrt{\text{length}/100} \rfloor$$

Consequently, there is a non-linear relationship between length and number of fragments at which probes should be targeted, i.e. the number is increasing only moderately with increasing lengths of the intergenic stretches.

OligoWiz v2.1.0 (13th of December, 2005) and a custom script were used to design a maximum of 3 probes for each intergenic segment or fragment with a minimum of 30 bps between start positions and a minimum weighted score of 0.5.

Other settings: min/max/aim oligo length 55/60/57, Tm model: DNA:DNA, position: middle primed (only for score, not included in overall score). Optimum temperature mean of those for genes (84). All probes including non-standard nucleotides (standard=ATGC) were removed before the probe selection step.

Weighted scores based on the following scores:

| <i>Property ( score 0-1000)</i> | <i>Sub-design 3</i> |
|---------------------------------|---------------------|
| A. Cross hybridization          | 2.0                 |
| B. Melting temperature          | 2.0                 |
| C. Position                     | (not included)      |
| D. Weighted information         | (not included)      |
| E. Complexity                   | 0.7                 |
| F. Gap score                    | (not included)      |
| G. 1000 – gap score             | (not included)      |
| H. Folding                      | 1                   |

Total: 46998 probes

## Truncation

103 probes were truncated from the 3' end (right) due to the requirement of more than 180 synthesis cycles.

NimbleGen synthesizes 3'→5' in A, C, G, T order. Each synthesis base counts as a cycle. Therefore the least expensive probe to make is TGCA (5'→3') and the most expensive is ACGT.

The probe ids and sequences of the truncated probes may be found in the file 'probes\_truncated.ckd'.

## Experimental design

The following Symbioflor2 *E. coli* isolates and control strains were included in this study:

| <i>Symbioflor2 isolates</i> | <i>Date</i> | <i>Conc. ug/ul</i> |
|-----------------------------|-------------|--------------------|
| S2 G 1/2                    | 21.06.2005  | 1.4195519          |
| S2 G 3/10                   | 22.06.2005  | 0.8157120          |
| S2 G 4/9                    | 23.06.2005  | 1.6990042          |
| S2 G 5                      | 28.06.2005  | 1.4160642          |

| <i>Control strains</i> | <i>Date</i> | <i>Conc. ug/ul</i> |
|------------------------|-------------|--------------------|
| K-12 MG1655            | 21.06.2005  | 1.7247639          |
| O157:H7 EDL933         | 22.06.2005  |                    |

Dilution schema, NimbleGen requires 250 ng/ul -> 0.25 ug/ul, at least 2.5 ug (4 ug for pathogenic):

|                | Sample vol | TE buffer | Tot. volume | Total amount |
|----------------|------------|-----------|-------------|--------------|
| S2 G 1/2       | 7.04 ul    | 33 ul     | 40 ul       | 10 ug        |
| S2 G 3/10      | 12.2 ul    | 27.7 ul   | 40 ul       | 10 ug        |
| S2 G 4/9       | 5.9 ul     | 34.1 ul   | 40 ul       | 10 ug        |
| S2 G 5         | 7.1 ul     | 32.9 ul   | 40 ul       | 10 ug        |
| K-12 MG1655    | 11.6 ul    | 68.4 ul   | 80 ul       | 20 ug        |
| O157:H7 EDL933 |            |           | 80 ul       | 20 ug        |

## Hybridization scheme

8x array CGH with samples in duplicates, but only single copies of each sample/control pair. Additional replicated control strain hybridizations.

| <i>Array#</i> | <i>Test strain</i> | <i>Control</i> |
|---------------|--------------------|----------------|
| 1             | S2 G 1/2           | K-12 MG1655    |
| 2             | S2 G 1/2           | EDL933         |
| 3             | S2 G 3/10          | K-12 MG1655    |
| 4             | S2 G 3/10          | EDL933         |
| 5             | S2 G 4/9           | K-12 MG1655    |
| 6             | S2 G 4/9           | EDL933         |
| 7             | S2 G 5             | K-12 MG1655    |
| 8             | S2 G 5             | EDL933         |
| 9             | EDL933             | K-12 MG1655    |
| 10            | EDL933             | K-12 MG1655    |
